# Supplementary material for: Emergence of Fluoroquinolone-Resistant Campylobacter jejuni and Campylobacter coli among Australian Chickens in the Absence of Fluoroquinolone Use
Source: PubMed Central journal article supplement (PMC7117913; doi:10.1128/aem.02765-19), 2020-04-01
Supplement: AEM.02765-19-s0001.pdf [file AEM.02765-19-s0001.pdf]

1

## Supplementary Material

2 **Table S1. Breakpoints used for susceptibility testing of *Campylobacter* species**

| Class                  | Agent          | Species          | Range<br>(mg/L) | ECOFF <sup>a</sup> |
|------------------------|----------------|------------------|-----------------|--------------------|
| <b>Aminoglycosides</b> | Gentamicin     | All              | 0.12 - 32       | 2                  |
| <b>Ketolides</b>       | Telithromycin  | All <sup>b</sup> | 0.015 - 8       | 4                  |
| <b>Lincosamide</b>     | Clindamycin    | <i>C. coli</i>   | 0.03 - 16       | 1                  |
|                        |                | <i>C. jejuni</i> | 0.03 - 16       | 0.5                |
| <b>Macrolides</b>      | Azithromycin   | <i>C. coli</i>   | 0.015 - 64      | 0.5                |
|                        |                | <i>C. jejuni</i> | 0.015 - 64      | 0.25               |
|                        | Erythromycin   | <i>C. coli</i>   | 0.03 - 64       | 8                  |
|                        |                | <i>C. jejuni</i> | 0.03 - 64       | 4                  |
| <b>Phenicols</b>       | Florfenicol    | All              | 0.03 - 64       | 4                  |
| <b>Quinolones</b>      | Ciprofloxacin  | All              | 0.015 - 64      | 0.5                |
|                        | Nalidixic acid | All              | 4 - 64          | 16                 |
| <b>Tetracyclines</b>   | Tetracycline   | <i>C. coli</i>   | 0.06 - 64       | 2                  |
|                        |                | <i>C. jejuni</i> | 0.06 - 64       | 1                  |

3 <sup>a</sup> EUCAST epidemiological cut-off values (ECOFF) (mg/L)

4 <sup>b</sup> *C. coli* ECOFF derived from National Antimicrobial Resistance Monitoring System  
5 (NARMS) programme, Centre for Disease Control and Prevention (CDC)

6 **Table S2. Distribution of minimum inhibitory concentrations for *Campylobacter jejuni* (n=108) isolated from Australian**  
 7 **meat chickens.**

| Antimicrobial  | Minimum inhibitory concentration (mg/L) |      |      |      |      |      |      |     |      |      |      |     |     |      | % Resistant<br>(95% CI) |                 |
|----------------|-----------------------------------------|------|------|------|------|------|------|-----|------|------|------|-----|-----|------|-------------------------|-----------------|
|                | 0.016                                   | 0.03 | 0.06 | 0.13 | 0.25 | 0.5  | 1    | 2   | 4    | 8    | 16   | 32  | 64  | 128  |                         |                 |
| Azithromycin   | 56.5                                    | 38.0 | 4.6  | 0.0  | 0.0  | 0.0  | 0.0  | 0.0 | 0.0  | 0.0  | 0.0  | 0.0 | 0.0 | 0.0  | 0.9                     | 0.9 (0.0 – 5.1) |
| Ciprofloxacin  | 0.0                                     | 4.6  | 44.4 | 30.6 | 5.6  | 0.0  | 0.0  | 0.0 | 0.9  | 7.4  | 6.5  | 0.0 | 0.0 | 0.0  | 14.8 (8.7 – 22.9)       |                 |
| Clindamycin    | 0.0                                     | 17.6 | 43.5 | 34.3 | 3.7  | 0.0  | 0.0  | 0.0 | 0.0  | 0.9  | 0.0  | 0.0 | 0.0 | 0.0  | 0.9 (0.0 – 5.1)         |                 |
| Erythromycin   | 0.0                                     | 0.9  | 9.3  | 24.1 | 53.7 | 11.1 | 0.0  | 0.0 | 0.0  | 0.0  | 0.0  | 0.0 | 0.0 | 0.9  | 0.9 (0.0 – 5.1)         |                 |
| Florfenicol    | 0.0                                     | 0.0  | 0.0  | 0.9  | 8.3  | 50.0 | 40.7 | 0.0 | 0.0  | 0.0  | 0.0  | 0.0 | 0.0 | 0.0  | 0.0 (0.0 – 3.4)         |                 |
| Gentamicin     | 0.0                                     | 0.0  | 0.0  | 7.4  | 50.9 | 41.7 | 0.0  | 0.0 | 0.0  | 0.0  | 0.0  | 0.0 | 0.0 | 0.0  | 0.0 (0.0 – 3.4)         |                 |
| Nalidixic acid | 0.0                                     | 0.0  | 0.0  | 0.0  | 0.0  | 0.0  | 0.0  | 0.0 | 65.7 | 19.4 | 0.0  | 0.0 | 2.8 | 12.0 | 14.8 (8.7 – 22.9)       |                 |
| Telithromycin  | 0.0                                     | 0.0  | 4.6  | 13.9 | 23.1 | 49.1 | 8.3  | 0.0 | 0.0  | 0.0  | 0.9  | 0.0 | 0.0 | 0.0  | 0.9 (0.0 – 5.1)         |                 |
| Tetracycline   | 0.0                                     | 0.0  | 20.4 | 33.3 | 18.5 | 4.6  | 0.9  | 2.8 | 0.0  | 0.9  | 10.2 | 6.5 | 0.9 | 0.9  | 22.2 (14.7 – 31.2)      |                 |

8 % Resistant: Percentage of isolates classified as non-wild type by EUCAST, and corresponding 95% confidence limits.

9

10 **Table S3. Distribution of minimum inhibitory concentrations for *Campylobacter coli* (n=96) isolated from Australian meat**  
 11 **chickens.**

| Antimicrobial         | Minimum inhibitory concentration (mg/L) |      |      |      |      |      |      |     |      |      |     |     |     |     | % Resistant<br>(95% CI) |                  |
|-----------------------|-----------------------------------------|------|------|------|------|------|------|-----|------|------|-----|-----|-----|-----|-------------------------|------------------|
|                       | 0.016                                   | 0.03 | 0.06 | 0.13 | 0.25 | 0.5  | 1    | 2   | 4    | 8    | 16  | 32  | 64  | 128 |                         |                  |
| <b>Azithromycin</b>   | 7.3                                     | 42.7 | 36.5 | 8.3  | 0.0  | 0.0  | 0.0  | 0.0 | 0.0  | 0.0  | 0.0 | 0.0 | 0.0 | 0.0 | 5.2                     | 5.2 (1.7 – 11.7) |
| <b>Ciprofloxacin</b>  | 0.0                                     | 4.2  | 39.6 | 42.7 | 8.3  | 0.0  | 0.0  | 0.0 | 2.1  | 3.1  | 0.0 | 0.0 | 0.0 | 0.0 | 0.0                     | 5.2 (1.7 – 11.7) |
| <b>Clindamycin</b>    | 0.0                                     | 0.0  | 11.5 | 49.0 | 32.3 | 2.1  | 0.0  | 2.1 | 2.1  | 1.0  | 0.0 | 0.0 | 0.0 | 0.0 | 0.0                     | 5.2 (1.7 – 11.7) |
| <b>Erythromycin</b>   | 0.0                                     | 0.0  | 0.0  | 9.4  | 42.7 | 28.1 | 10.4 | 4.2 | 0.0  | 0.0  | 0.0 | 0.0 | 0.0 | 0.0 | 5.2                     | 5.2 (1.7 – 11.7) |
| <b>Florfenicol</b>    | 0.0                                     | 0.0  | 0.0  | 0.0  | 6.3  | 43.8 | 45.8 | 4.2 | 0.0  | 0.0  | 0.0 | 0.0 | 0.0 | 0.0 | 0.0                     | 0.0 (0.0 – 3.8)  |
| <b>Gentamicin</b>     | 0.0                                     | 0.0  | 0.0  | 4.2  | 26.0 | 68.8 | 1.0  | 0.0 | 0.0  | 0.0  | 0.0 | 0.0 | 0.0 | 0.0 | 0.0                     | 0.0 (0.0 – 3.8)  |
| <b>Nalidixic acid</b> | 0.0                                     | 0.0  | 0.0  | 0.0  | 0.0  | 0.0  | 0.0  | 0.0 | 55.2 | 39.6 | 0.0 | 0.0 | 2.1 | 3.1 | 5.2 (1.7 – 11.7)        |                  |
| <b>Telithromycin</b>  | 0.0                                     | 0.0  | 0.0  | 11.5 | 24.0 | 33.3 | 15.6 | 7.3 | 4.2  | 0.0  | 4.2 | 0.0 | 0.0 | 0.0 | 4.2                     | 4.2 (1.1 – 10.3) |
| <b>Tetracycline</b>   | 0.0                                     | 0.0  | 15.6 | 43.8 | 29.2 | 6.3  | 2.1  | 0.0 | 0.0  | 0.0  | 2.1 | 0.0 | 0.0 | 1.0 | 3.1                     | 3.1 (0.6 – 8.9)  |

12 % Resistant: Percentage of isolates classified as non-wild type by EUCAST, and corresponding 95% confidence limits.

13

14

15

16 **Table S4. MLST and resistance profile of *Campylobacter jejuni* isolates (n=107)**

17

| <b>Clonal Complex</b> | <b>MLST</b> | <b>Number of isolates</b> | <b>QRDR mutation</b> | <b>Ciprofloxacin (S/R)</b> |
|-----------------------|-------------|---------------------------|----------------------|----------------------------|
| N/a                   | 7323        | 9                         | yes                  | R                          |
| N/a                   | 2083        | 8                         | yes                  | R                          |
| <b>48</b>             | 2343        | 1                         | yes                  | R                          |
| <b>460</b>            | 535         | 7                         |                      | S                          |
| <b>353</b>            | 4896        | 7                         |                      | S                          |
| N/a                   | 9432        | 7                         |                      | S                          |
| <b>45</b>             | 45          | 5                         |                      | S                          |
| <b>354</b>            | 528         | 5                         |                      | S                          |
| <b>48</b>             | 48          | 4                         |                      | S                          |
| <b>21</b>             | 50          | 4                         |                      | S                          |
| <b>52</b>             | 161         | 3                         |                      | S                          |
| <b>257</b>            | 257         | 3                         |                      | S                          |
| <b>354</b>            | 354         | 3                         |                      | S                          |
| <b>45</b>             | 6722        | 3                         |                      | S                          |
| <b>22</b>             | 7888        | 3                         |                      | S                          |
| N/a                   | 9422        | 3                         |                      | S                          |
| N/a                   | 449         | 2                         |                      | S                          |
| <b>45</b>             | 583         | 2                         |                      | S                          |
| <b>257</b>            | 7572        | 2                         |                      | S                          |
| <b>21</b>             | 8470        | 2                         |                      | S                          |
| N/a                   | 9425        | 2                         |                      | S                          |
| N/a                   | 9426        | 2                         |                      | S                          |
| N/a                   | 9429        | 2                         |                      | S                          |
| <b>42</b>             | 42          | 1                         |                      | S                          |
| <b>206</b>            | 46          | 1                         |                      | S                          |
| <b>21</b>             | 190         | 1                         |                      | S                          |
| <b>45</b>             | 233         | 1                         |                      | S                          |
| <b>607</b>            | 525         | 1                         |                      | S                          |
| <b>22</b>             | 567         | 1                         |                      | S                          |
| N/a                   | 791         | 1                         |                      | S                          |
|                       | 996         | 1                         |                      | S                          |
| <b>692</b>            | 3804        | 1                         |                      | S                          |
| <b>692</b>            | 4378        | 1                         |                      | S                          |
| <b>1332</b>           | 6788        | 1                         |                      | S                          |
| N/a                   | 7013        | 1                         |                      | S                          |
| <b>443</b>            | 7208        | 1                         |                      | S                          |
| <b>45</b>             | 8559        | 1                         |                      | S                          |
| N/a                   | 9424        | 1                         |                      | S                          |
| N/a                   | 9427        | 1                         |                      | S                          |
| N/a                   | 9428        | 1                         |                      | S                          |
| N/a                   | 9431        | 1                         |                      | S                          |

18

19 Isolates grouped by MLST with resistant isolates above the line. Gaps represent no presence.  
 20 S-sensitive; R-resistant. QRDR; quinolone resistance-determining region.

21

22 **Table S5. MLST and resistance profile of *Campylobacter coli* (n=95)**

23

| Clonal Complex | MLST | Number of isolates | QRDR mutation | Ciprofloxacin (S/R) |
|----------------|------|--------------------|---------------|---------------------|
| <b>828</b>     | 860  | 5                  | yes           | R                   |
| <b>828</b>     | 860  | 2                  |               | S                   |
| <b>828</b>     | 1181 | 14                 |               | S                   |
| -              | 9419 | 14                 |               | S                   |
| <b>828</b>     | 827  | 9                  |               | S                   |
| <b>828</b>     | 3985 | 9                  |               | S                   |
| <b>828</b>     | 825  | 8                  |               | S                   |
| <b>828</b>     | 832  | 6                  |               | S                   |
| -              | 9420 | 4                  |               | S                   |
| -              | 1243 | 3                  |               | S                   |
| -              | 1764 | 2                  |               | S                   |
| -              | 9418 | 2                  |               | S                   |
| -              | 9421 | 2                  |               | S                   |
| -              | 9436 | 2                  |               | S                   |
| -              | 2534 | 1                  |               | S                   |
| <b>828</b>     | 6755 | 1                  |               | S                   |
|                | 8714 | 1                  |               | S                   |
| -              | 9417 | 1                  |               | S                   |
| -              | 9423 | 1                  |               | S                   |
| -              | 9430 | 1                  |               | S                   |
| -              | 9433 | 1                  |               | S                   |
| -              | 9434 | 1                  |               | S                   |
| -              | 9435 | 1                  |               | S                   |
| -              | -    | 3                  |               | S                   |

24 Isolates grouped by MLST with the resistant isolates above the line. Gaps represent no  
 25 presence. S-sensitive; R-resistant. QRDR; quinolone resistance-determining region.

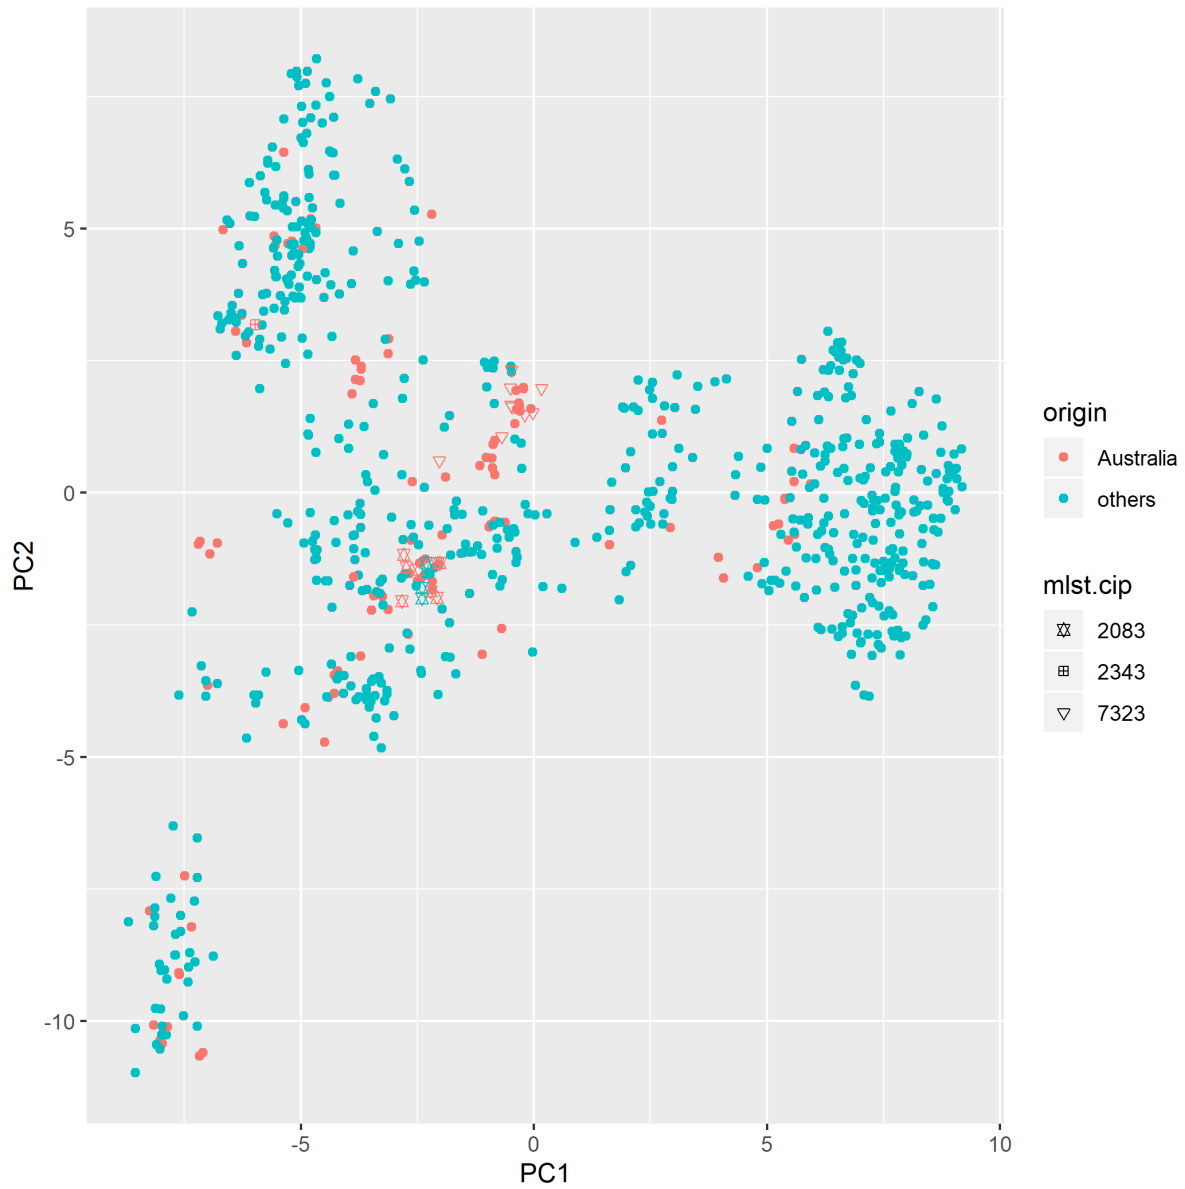

26

27 **Figure S1.** Principal component analysis ordination of total gene content for Australian *C. jejuni* and  
 28 international collection where no distinct clustering is observed. Strain types resistant to ciprofloxacin  
 29 are shown as mlst.cip.

30

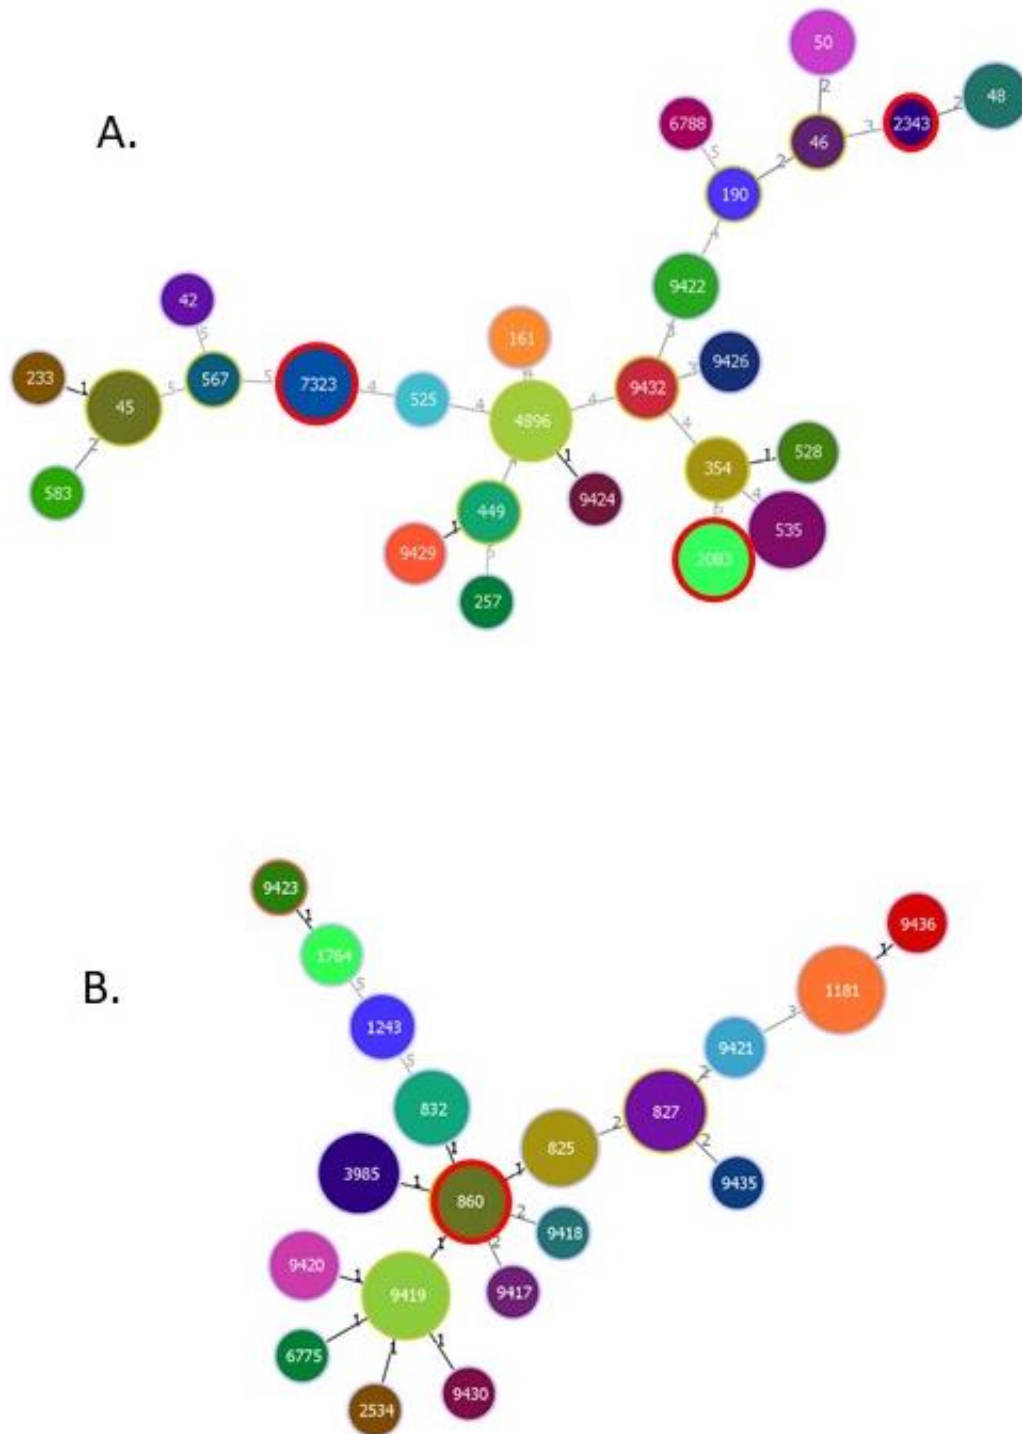

31

32 **Figure S2.** Minimum spanning trees based on MLST loci of *C. jejuni* (A) and *C. coli* (B). Branch  
 33 numbers indicate number of loci variants, STs in bold red outlines are those with fluoroquinolone  
 34 resistance.

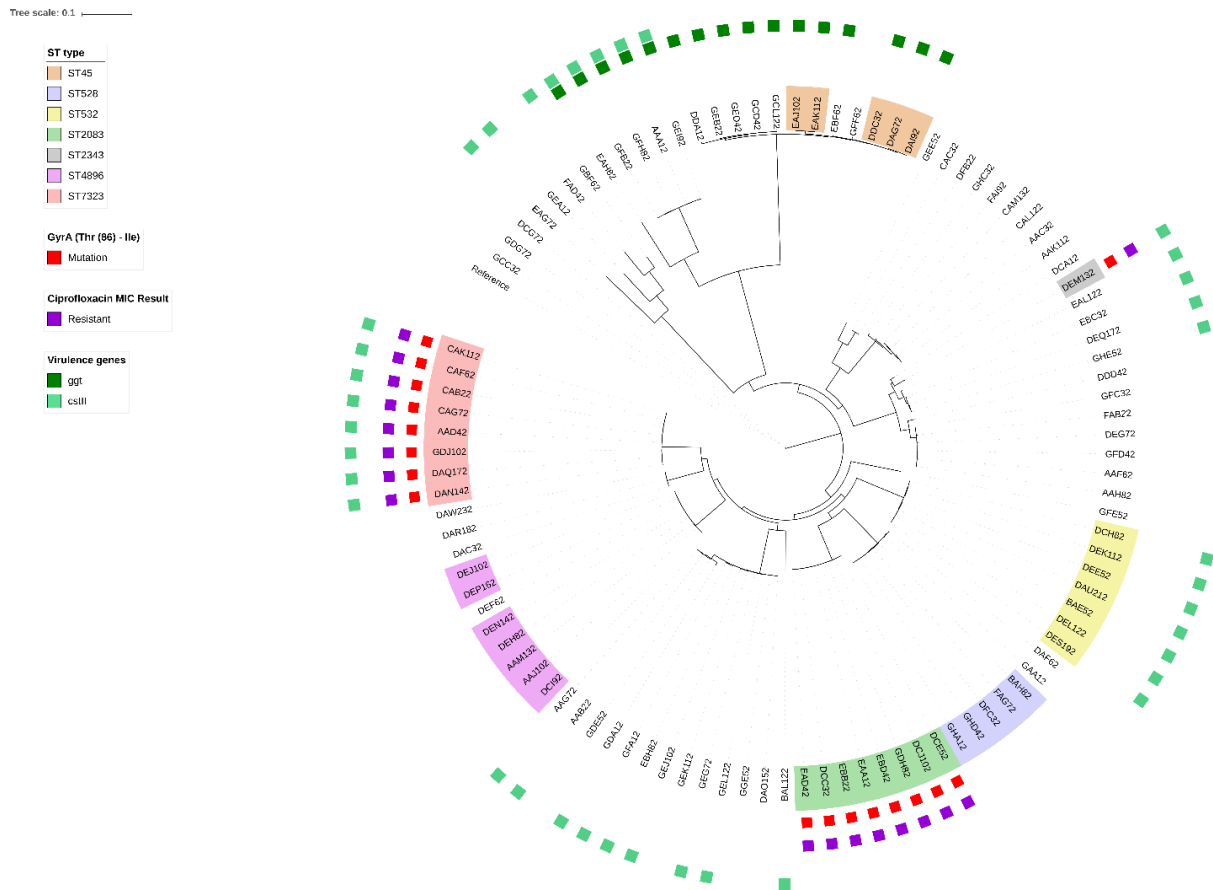

35

36

37 **Figure S3.** A maximum likelihood phylogeny based on the single nucleotide polymorphisms  
 38 (SNPs) in the core genome of all *C. jejuni* isolated from Australian chickens. The  
 39 phylogenetic tree also displays multilocus sequence types, antimicrobial resistance genes,  
 40 phenotypic and genotypic (mutation of *gyrA*) resistance to ciprofloxacin of each isolates.

41

42

43



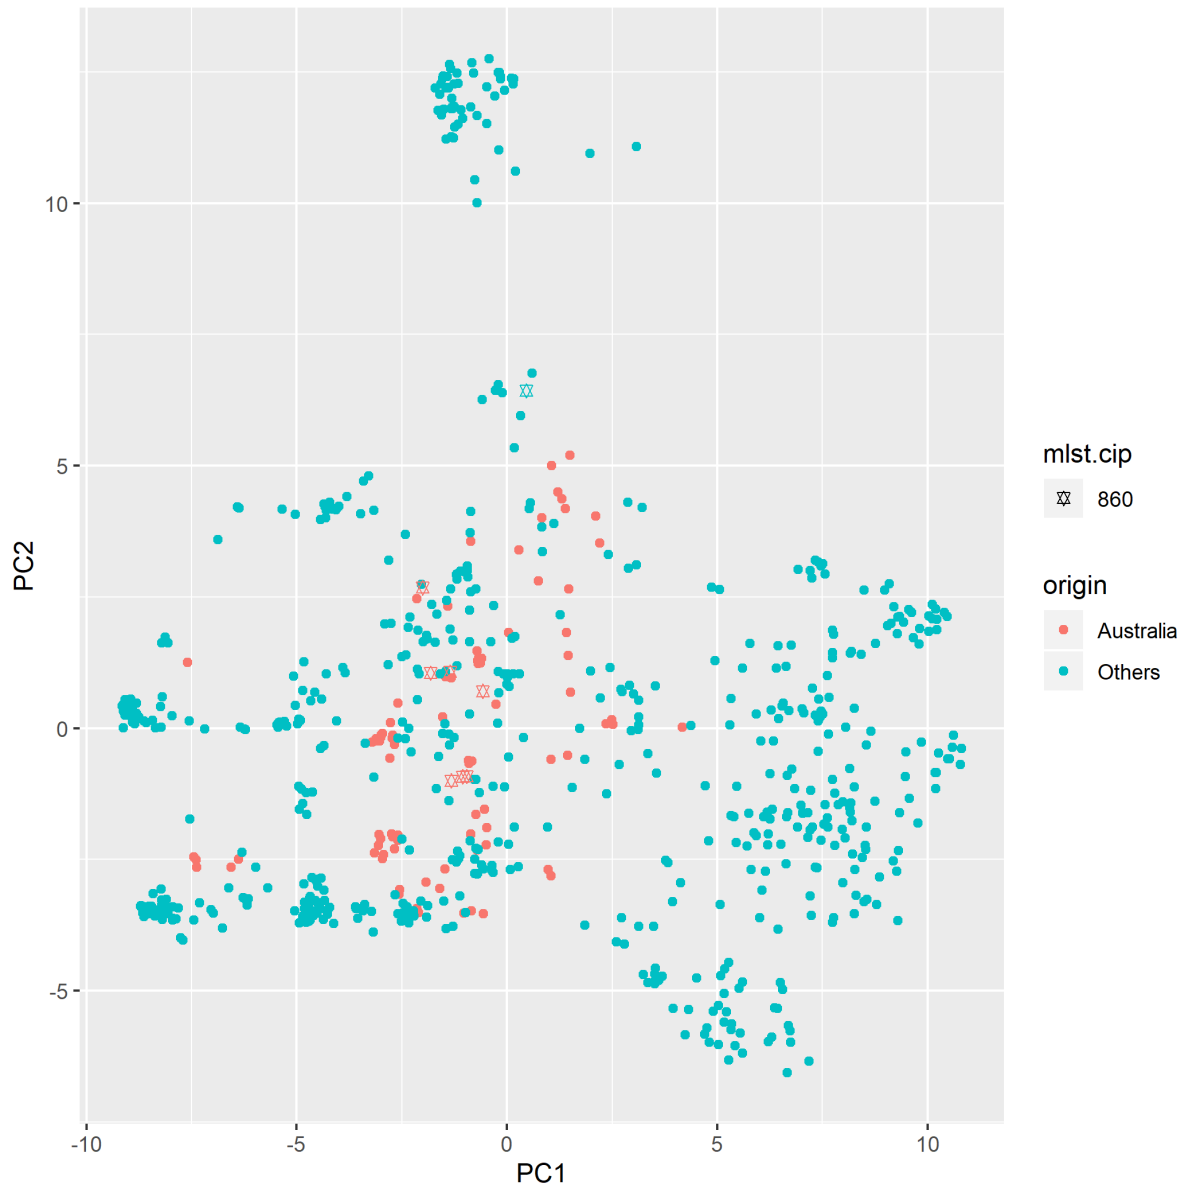

44

45 **Figure S4.** Principal component analysis ordination of total gene content for Australian *C.*  
 46 *coli* and international collection where no distinct clustering is observed. Strain types  
 47 resistant to ciprofloxacin are shown as mlst.cip.

48

49

50

Tree scale: 0.1

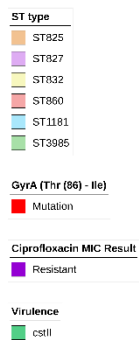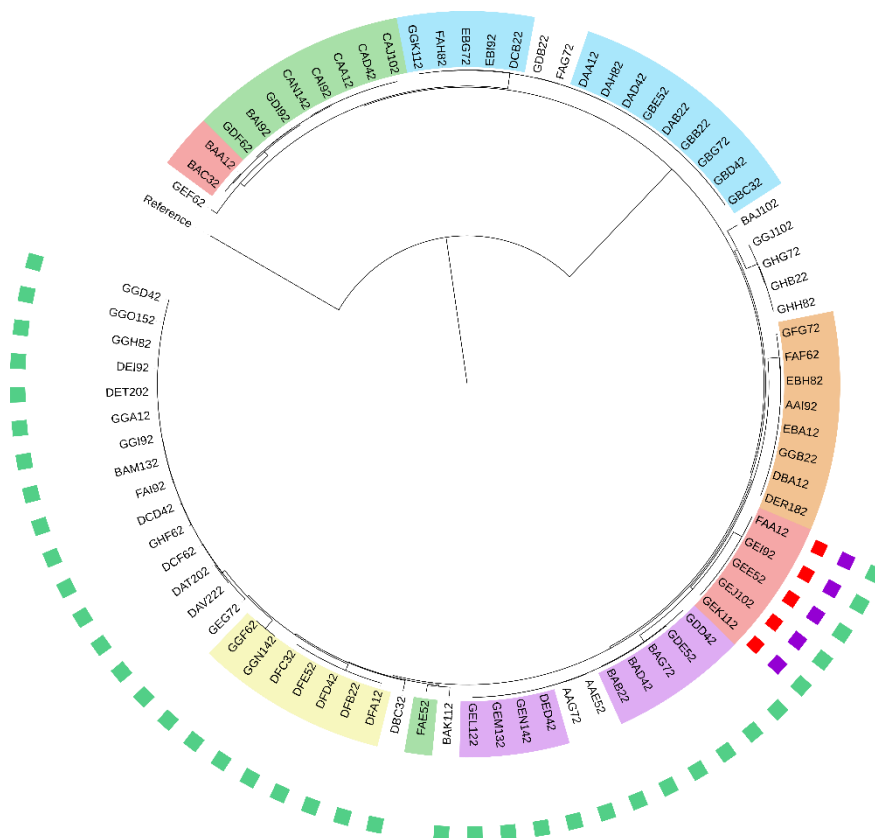

51

52 **Figure S5.** A maximum likelihood phylogeny based on the single nucleotide polymorphisms  
53 (SNPs) in the core genome of *C. coli* isolates belonging to Australian clade 3. The  
54 phylogenetic tree also displays multilocus sequence types, antimicrobial resistance genes,  
55 phenotypic and genotypic (mutation of *gyrA*) resistance to ciprofloxacin of each isolates.
